# Supplementary material for: Optic disc and peripapillary vessel density measured with optical coherence tomography angiography and its associations in Chinese adults: a large population-based study
Source: HighWire-hosted journal article supplement (doi:10.1136/bjophthalmol-2020-318199), 2021-05-20
Supplement: bjophthalmol-2020-318199supp002_data_supplement.pdf [file bjophthalmol-2020-318199supp002_data_supplement.pdf]

Supplementary Table 1 The vessel density(%) of peripapillary sectors at NFLP slab stratified by age

|       | Superior nasal     | Nasal              | Inferior nasal     | Inferior temporal  | Temporal           | Superior temporal  |
|-------|--------------------|--------------------|--------------------|--------------------|--------------------|--------------------|
| 18~29 | 57.44(56.75~58.12) | 55.51(54.83~56.19) | 59.85(59.11~60.58) | 62.99(62.4~63.59)  | 63(62.52~63.48)    | 65.27(64.73~65.82) |
| 30~39 | 59.37(58.46~60.29) | 57.08(56.16~58)    | 62.38(61.54~63.22) | 64.4(63.64~65.16)  | 63.23(62.5~63.96)  | 66.46(65.79~67.12) |
| 40~49 | 59.39(58.72~60.06) | 58.14(57.58~58.71) | 62.87(62.28~63.46) | 64.47(63.92~65.02) | 62.84(62.33~63.35) | 65.74(65.24~66.24) |
| 50~59 | 58.68(58.11~59.26) | 57.72(57.24~58.21) | 61.74(61.22~62.25) | 64.12(63.62~64.63) | 61.83(61.34~62.32) | 64.78(64.27~65.3)  |
| 60~69 | 57.4(56.61~58.2)   | 56.57(55.89~57.25) | 60.48(59.73~61.23) | 62.53(61.73~63.34) | 59.41(58.7~60.11)  | 63.83(63.2~64.45)  |
| 70~90 | 55.26(54.01~56.51) | 53.87(52.52~55.22) | 57.46(56.08~58.83) | 60.64(59.29~61.99) | 58.04(56.61~59.47) | 62.77(61.62~63.93) |
| Total | 58.19(57.87~58.5)  | 56.87(56.59~57.16) | 61.15(60.84~61.45) | 63.48(63.19~63.76) | 61.63(61.36~61.9)  | 64.88(64.63~65.14) |

The data were shown in the form of mean (95% confidence interval); NFLP: nerve fiber layer plexure, ranging from ILM to outer limit of nerve fiber layer
